# Supplementary material for: Insulin effects on honeybee appetitive behaviour
Source: Oxford University Press journal article supplement (doi:10.1242/jeb.143511), 2016-01-01
Supplement: jeb143511supp.pdf [file jeb143511supp.pdf]

**Table S1. Set of generalised linear models explaining honeybees' spontaneous response towards any odour.**

| Model                                    | $K$ | AIC    | $\Delta_i$ | $w_i$ |
|------------------------------------------|-----|--------|------------|-------|
| 1. Rearing environment*Age*Treatment     | 16  | 631.99 | 7.70       | 0.01  |
| 2. Rearing environment + Age*Treatment   | 9   | 632.86 | 7.55       | 0.01  |
| 3. Rearing environment*Age + Treatment   | 9   | 624.30 | 0          | 0.46  |
| 4. Rearing environment*Treatment + Age   | 7   | 630.06 | 5.76       | 0.03  |
| 5. Rearing environment + Age + Treatment | 6   | 628.90 | 4.61       | 0.05  |
| 6. Age + Treatment                       | 5   | 626.95 | 2.65       | 0.12  |
| 7. Treatment                             | 2   | 625.13 | 0.83       | 0.30  |
| 8. Null                                  | 1   | 629.96 | 5.66       | 0.03  |

$K$  is the number of model parameters.  $\Delta_i$  is the difference in AIC between the model  $i$  and the most supported model (lowest AIC value),  $w_i$  is the Akaike weight of the model. Although model 3 has the lowest AIC value, model 7 was chosen as the minimal adequate model for making inference from the data as the gain in parsimony outweighed the loss in fit ( $\Delta_i = 0.83$ ).

**Table S2. Set of generalised linear mixed effect models explaining honeybees' spontaneous response towards linalool and phenylacetaldehyde.**

| Model                                 | $K$ | AIC    | $\Delta_i$ | $w_i$         |
|---------------------------------------|-----|--------|------------|---------------|
| 1. RE*Age*Treatment*Odour + Bee       | 32  | 895.56 | 93.46      | $1.65e^{-21}$ |
| 2. RE + Age*Treatment*Odour + Bee     | 17  | 847.98 | 45.88      | $3.55e^{-11}$ |
| 3. Age + RE*Treatment*Odour + Bee     | 11  | 861.47 | 59.37      | $4.17e^{-14}$ |
| 4. Treatment + RE*Age*Odour + Bee     | 17  | 862.46 | 60.36      | $2.54e^{-14}$ |
| 5. Odour + RE*Age*Treatment + Bee     | 17  | 868.49 | 66.39      | $1.25e^{-15}$ |
| 6. RE + Age + Treatment*Odour + Bee   | 8   | 814.19 | 12.09      | $7.71e^{-04}$ |
| 7. RE + Treatment + Age *Odour + Bee  | 10  | 815.82 | 13.72      | $3.41e^{-04}$ |
| 8. RE + Odour + Age*Treatment + Bee   | 10  | 833.83 | 31.73      | $4.19e^{-08}$ |
| 9. RE + Age + Treatment + Odour + Bee | 7   | 812.70 | 10.60      | $1.63e^{-03}$ |
| 10. Age + Treatment + Odour + Bee     | 6   | 810.12 | 8.02       | $5.90e^{-03}$ |
| 11. RE + Treatment + Odour + Bee      | 4   | 807.09 | 4.99       | $2.69e^{-02}$ |
| 12. RE + Age + Odour + Bee            | 6   | 811.13 | 9.03       | $3.56e^{-03}$ |
| 13. RE + Age + Treatment Bee          | 6   | 810.13 | 8.03       | $5.87e^{-03}$ |
| 14. Treatment + Odour + Bee           | 3   | 805.09 | 2.99       | $7.30e^{-02}$ |
| 15. RE + Odour + Bee                  | 3   | 806.09 | 3.99       | $4.43e^{-02}$ |
| 16. RE + Treatment + Bee              | 3   | 805.09 | 2.99       | $7.30e^{-02}$ |
| 17. RE + Bee                          | 2   | 804.09 | 1.99       | $1.20e^{-01}$ |
| 18. Treatment + Bee                   | 2   | 803.09 | 0.99       | $1.98e^{-01}$ |
| 19. Odour + Bee                       | 2   | 804.09 | 1.99       | $1.20e^{-01}$ |
| 20. Bee (null)                        | 1   | 802.1  | 0          | $3.26e^{-01}$ |

$K$  is the number of model parameters.  $\Delta_i$  is the difference in AIC between the model  $i$  and the most supported model (lowest AIC value),  $w_i$  is the Akaike weight of the model. RE stands for rearing environment.

**Table S3. Set of generalised linear models explaining honeybees' gustatory responsiveness.**

| Model                                    | $K$ | AIC     | $\Delta_i$ | $w_i$         |
|------------------------------------------|-----|---------|------------|---------------|
| 1. Rearing environment*Age*Treatment     | 16  | 2090,78 | 7.66       | $2.12e^{-02}$ |
| 2. Rearing environment + Age*Treatment   | 9   | 2083.14 | 0          | $9.79e^{-01}$ |
| 3. Rearing environment*Age + Treatment   | 9   | 2131.36 | 48.23      | $3.30e^{-11}$ |
| 4. Rearing environment* Treatment + Age  | 7   | 2129.11 | 45.98      | $1.02e^{-10}$ |
| 5. Rearing environment + Age + Treatment | 6   | 2117.51 | 44.37      | $2.27e^{-10}$ |
| 6. Age*Treatment                         | 8   | 2111.48 | 28.35      | $6.84e^{-07}$ |
| 7. Age + Treatment                       | 5   | 2155.48 | 72.34      | $1.91e^{-16}$ |
| 8. Rearing environment                   | 2   | 2157.00 | 89.92      | $2.92e^{-20}$ |
| 9. Age                                   | 4   | 2173.05 | 84.04      | $5.50e^{-19}$ |
| 10. Treatment                            | 2   | 2167.18 | 73.86      | $8.94e^{-17}$ |
| 11. Null                                 | 1   | 2157.00 | 101.89     | $7.35e^{-23}$ |

$K$  is the number of model parameters.  $\Delta_i$  is the difference in AIC between the model  $i$  and the most supported model (lowest AIC value),  $w_i$  is the Akaike weight of the model.

**Table S4. Set of generalised linear models explaining honeybees' odour discrimination during the training phase of a classical PER conditioning.**

| Model              | $K$ | AIC    | $\Delta_i$ | $w_i$         |
|--------------------|-----|--------|------------|---------------|
| 1. Age*Treatment   | 4   | 576.84 | 0          | 0.99          |
| 2. Age + Treatment | 3   | 590.28 | 13.44      | $1.19e^{-03}$ |
| 3. Age             | 2   | 588.63 | 11.88      | $2.60e^{-03}$ |
| 4. Treatment       | 2   | 588.72 | 11.79      | $2.72e^{-03}$ |
| 5. Null            | 1   | 587.08 | 10.23      | $5.89e^{-03}$ |

$K$  is the number of model parameters.  $\Delta_i$  is the difference in AIC between the model  $i$  and the most supported model (lowest AIC value),  $w_i$  is the Akaike weight of the model.

**Table S5. Set of generalised linear models explaining honeybees' odour discrimination during the testing phase of a classical PER conditioning.**

| Model                          | $K$ | AIC    | $\Delta_i$ | $w_i$         |
|--------------------------------|-----|--------|------------|---------------|
| 1. Age* <sup>*</sup> Treatment | 4   | 206.66 | 0          | $9.91e^{-01}$ |
| 2. Age + Treatment             | 3   | 225.16 | 18.51      | $9.57e^{-05}$ |
| 3. Age                         | 2   | 223.50 | 16.64      | $2.43e^{-04}$ |
| 4. Treatment                   | 2   | 223.30 | 16.84      | $2.20e^{-04}$ |
| 5. Null                        | 1   | 221.63 | 14.98      | $5.59e^{-04}$ |

$K$  is the number of model parameters.  $\Delta_i$  is the difference in AIC between the model  $i$  and the most supported model (lowest AIC value),  $w_i$  is the Akaike weight of the model.
